# Supplementary material
Source: PubMed Central journal article supplement (PMC1129095)
Supplement: pnas_0408734102_2.pdf [file pnas_0408734102_2.pdf]

**Table 2. Values of  $Y_{X/ATP}^{True}$  calculated for various values of  $\alpha$  and  $n$**

| Value of $n$ | $Y_{X/ATP}^{True}$<br>g cells/mol ATP |                  |                  |                  |
|--------------|---------------------------------------|------------------|------------------|------------------|
|              | Cellobiose                            |                  | Cellulose        |                  |
|              | $\alpha = 1$                          | $\alpha = 2$     | $\alpha = 1$     | $\alpha = 2$     |
| 2            | $16.44 \pm 0.89$                      | $22.52 \pm 1.50$ | $20.10 \pm 0.56$ | $26.14 \pm 0.74$ |
| 4.2          | --                                    | --               | $16.18 \pm 0.44$ | $17.75 \pm 0.49$ |

Values of  $Y_{X/ATP}^{True}$  are calculated from the slopes of plots of the form of Fig. 1 based on continuous culture data for cellobiose (Table 3) and cellulose (Table 5).
